# Supplementary material
Source: Springer Nature journal article supplement (https://www.springermedizin.de/resource/supplementary/13014_2011_451_MOESM7_ESM.pdf/9633466)

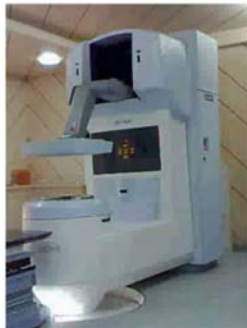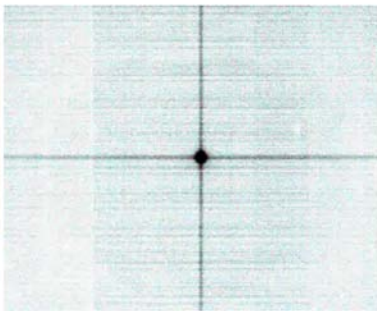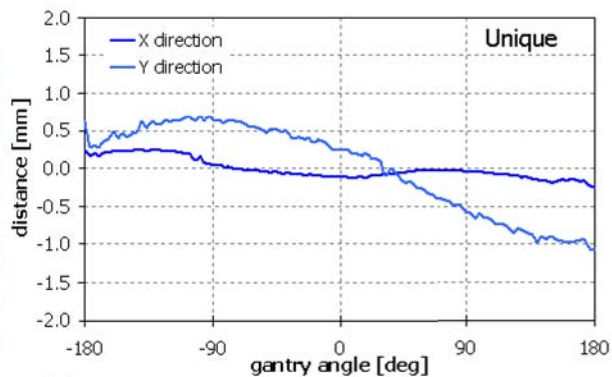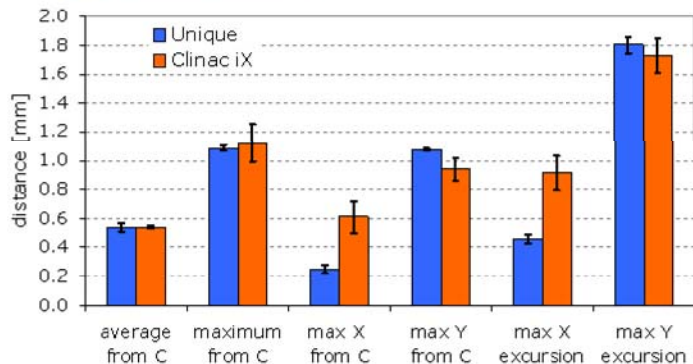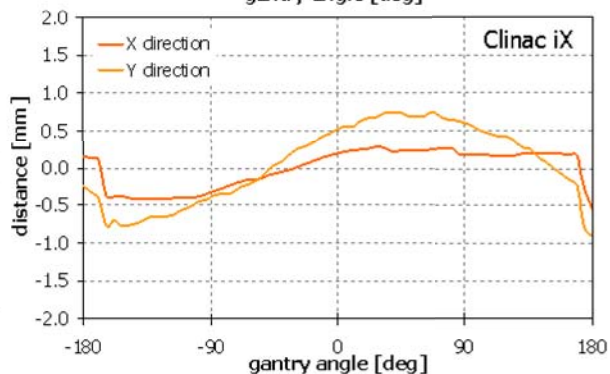

Supplement: MOESM7 [file 9633466]
